29. Sancetta, S. M.; Lynn, R. B.; Simeone, F. A.; Scott, R. W., and Heckman, G.: Studies of Hemodynamic Changes in Humans Following Induction of Low and High Spinal Anesthesia. I. General Considerations of Problem. Changes in Cardiac Output, Brachial Arterial Pressure, Peripheral and Pulmonary Oxygen Contents and Peripheral Blood Flows Induced by Spinal Anesthesia in Humans Not Undergoing Surgery, *Circulation* 6: 559-571 (Oct.) 1952.
30. Lagerlöf, H., and Werkö, L.: Studies on Circulation in Man; Normal Values for Cardiac Output and Pressure in Right Auricle, Right Ventricle and Pulmonary Artery, *Acta Physiol. Scandinav.* 16: 75-82 (1948).
31. Stend, E. A., Jr.; Warren, J. V.; Merrill, A. V., and Brannon, E. S.: Cardiac Output in Male Subjects as Measured by Technique of Right Atrial Catheterization. Normal Values with Observations on Effect of Anxiety and Tilting, *J. Clin. Invest.* 24: 326-331 (May) 1945.
32. McMichael, John, and Sharpey-Schafer, E. P.: Cardiac Output in Man by Direct Fick Method; Effects of Posture, Venous Pressure Change, Atropine, and Adrenaline, *Brit. Heart. J.* 6: 33-40 (1944).

---

#### NOTICE OF THE ANNUAL MEETING

THE AMERICAN SOCIETY OF ANESTHESIOLOGISTS, INC.

October 25-30, 1954

Cincinnati, Ohio
